# Supplementary material for: A Systematic Review of a Polyvagal Perspective on Embodied Contemplative Practices as Promoters of Cardiorespiratory Coupling and Traumatic Stress Recovery for PTSD and OCD: Research Methodologies and State of the Art
Source: MDPI journal article supplement (doi:10.3390/ijerph182211778), 2021-11-10
Supplement: s1 [file s1]

## Supplementary Materials

*Supplementary Table S1. JBI critical appraisal checklist for cross-sectional studies*

|                                                                             | Simon <i>et al.</i> 2014 |    |         |    |
|-----------------------------------------------------------------------------|--------------------------|----|---------|----|
|                                                                             | Yes                      | No | Unclear | NA |
| 1. Were the criteria for inclusion in the sample clearly defined?           | X                        |    |         |    |
| 2. Were the study subjects and the setting described in detail?             | X                        |    |         |    |
| 3. Was the exposure measured in a valid and reliable way?                   |                          |    | X       |    |
| 4. Were objective, standard criteria used for measurement of the condition? | X                        |    |         |    |
| 5. Were confounding factors identified?                                     |                          |    | X       |    |
| 6. Were strategies to deal with confounding factors stated?                 |                          |    | X       |    |
| 7. Were the outcomes measured in a valid and reliable way?                  | X                        |    |         |    |
| 8. Was appropriate statistical analysis used?                               | X                        |    |         |    |

Supplementary Table S2. JBI critical appraisal checklist for pre-post studies

|                                                                                                                                             | King <i>et al.</i> 2016 |    |         |    |
|---------------------------------------------------------------------------------------------------------------------------------------------|-------------------------|----|---------|----|
|                                                                                                                                             | Yes                     | No | Unclear | NA |
| 1. Is it clear in the study what is the ‘cause’ and what is the ‘effect’ (i.e. there is no confusion about which variable comes first)?     | X                       |    |         |    |
| 2. Were the participants included in any comparisons similar?                                                                               | X                       |    |         |    |
| 3. Were the participants included in any comparisons receiving similar treatment/care, other than the exposure or intervention of interest? | X                       |    |         |    |
| 4. Was there a control group?                                                                                                               | X                       |    |         |    |
| 5. Were there multiple measurements of the outcome both pre and post the intervention/exposure?                                             | X                       |    |         |    |
| 6. Was follow up complete and if not, were differences between groups in terms of their follow up adequately described and analyzed?        |                         | X  |         |    |
| 7. Were the outcomes of participants included in any comparisons measured in the same way?                                                  | X                       |    |         |    |
| 8. Were outcomes measured in a reliable way?                                                                                                | X                       |    |         |    |
| 9. Was appropriate statistical analysis used?                                                                                               | X                       |    |         |    |

Supplementary Table S3. JBI critical appraisal checklist for cohort studies

|                                                                                                               | Bhatnagar <i>et al.</i> 2013 |    |         |    | Yes | Kang <i>et al.</i> 2018 |         |    |
|---------------------------------------------------------------------------------------------------------------|------------------------------|----|---------|----|-----|-------------------------|---------|----|
|                                                                                                               | Yes                          | No | Unclear | NA |     | No                      | Unclear | NA |
| 1. Were the two groups similar and recruited from the same population?                                        |                              |    |         | X  |     |                         |         | X  |
| 2. Were the exposures measured similarly to assign people to both exposed and unexposed groups?               |                              |    |         | X  |     |                         |         | X  |
| 3. Was the exposure measured in a valid and reliable way?                                                     | X                            |    |         |    | X   |                         |         |    |
| 4. Were confounding factors identified?                                                                       |                              | X  |         |    |     |                         | X       |    |
| 5. Were strategies to deal with confounding factors stated?                                                   |                              | X  |         |    |     |                         | X       |    |
| 6. Were the groups/participants free of the outcome at the start of the study (or at the moment of exposure)? |                              |    | X       |    | X   |                         |         |    |
| 7. Were the outcomes measured in a valid and reliable way?                                                    | X                            |    |         |    | X   |                         |         |    |
| 8. Was the follow up time reported and sufficient to be long enough for outcomes to occur?                    | X                            |    |         |    | X   |                         |         |    |
| 9. Was follow up complete, and if not, were the reasons to loss to follow up described and explored?          |                              |    | X       |    | X   |                         |         |    |
| 10. Were strategies to address incomplete follow up utilized?                                                 |                              | X  |         |    |     |                         | X       |    |
| 11. Was appropriate statistical analysis used?                                                                |                              |    | X       |    | X   |                         |         |    |

Supplementary Table S4. JBI critical appraisal checklist for RCT studies

|                                                                                                                                                                                           | <b>Wahbeh et al. 2016</b> |    |         |    | <b>Williams et al. 2020</b> |    |         |    |
|-------------------------------------------------------------------------------------------------------------------------------------------------------------------------------------------|---------------------------|----|---------|----|-----------------------------|----|---------|----|
|                                                                                                                                                                                           | Yes                       | No | Unclear | NA | Yes                         | No | Unclear | NA |
| 1. Was true randomization used for assignment of participants to treatment groups?                                                                                                        | X                         |    |         |    | X                           |    |         |    |
| 2. Was allocation to treatment groups concealed?                                                                                                                                          | X                         |    |         |    | X                           |    |         |    |
| 3. Were treatment groups similar at the baseline?                                                                                                                                         | X                         |    |         |    |                             |    |         | X  |
| 4. Were participants blind to treatment assignment?                                                                                                                                       | X                         |    |         |    | X                           |    |         |    |
| 5. Were those delivering treatment blind to treatment assignment?                                                                                                                         |                           | X  |         |    |                             | X  |         |    |
| 6. Were outcomes assessors blind to treatment assignment?                                                                                                                                 | X                         |    |         |    | X                           |    |         |    |
| 7. Were treatment groups treated identically other than the intervention of interest?                                                                                                     | X                         |    |         |    | X                           |    |         |    |
| 8. Was follow up complete and if not, were differences between groups in terms of their follow up adequately described and analyzed?                                                      |                           | X  |         |    | X                           |    |         |    |
| 9. Were participants analyzed in the groups to which they were randomized?                                                                                                                | X                         |    |         |    | X                           |    |         |    |
| 10. Were outcomes measured in the same way for treatment groups?                                                                                                                          | X                         |    |         |    | X                           |    |         |    |
| 11. Were outcomes measured in a reliable way?                                                                                                                                             | X                         |    |         |    | X                           |    |         |    |
| 12. Was appropriate statistical analysis used?                                                                                                                                            | X                         |    |         |    | X                           |    |         |    |
| 13. Was the trial design appropriate, and any deviations from the standard RCT design (individual randomization, parallel groups) accounted for in the conduct and analysis of the trial? | X                         |    |         |    | X                           |    |         |    |
